# Supplementary material for: Role of BMP receptor traffic in synaptic growth defects in an ALS model
Source: PubMed Central journal article supplement — Mol Biol Cell. 2016 Oct 1;27(19):2898–910. doi: 10.1091/mbc.E16-07-0519 (PMC5042577; doi:10.1091/mbc.e16-07-0519), 2016-10-01
Supplement: supp_E16-07-0519v1_CombinedSupMats.pdf [file supp_E16-07-0519v1_CombinedSupMats.pdf]

# Supplemental Materials

*Molecular Biology of the Cell*

Deshpande et al.
